# Supplementary material for: Comparative Analysis of Salmon Cell Lines and Zebrafish Primary Cell Cultures Infection with the Fish Pathogen Piscirickettsia salmonis
Source: MDPI journal article supplement (doi:10.3390/microorganisms9122516), 2021-12-06
Supplement: s1 [file s1]

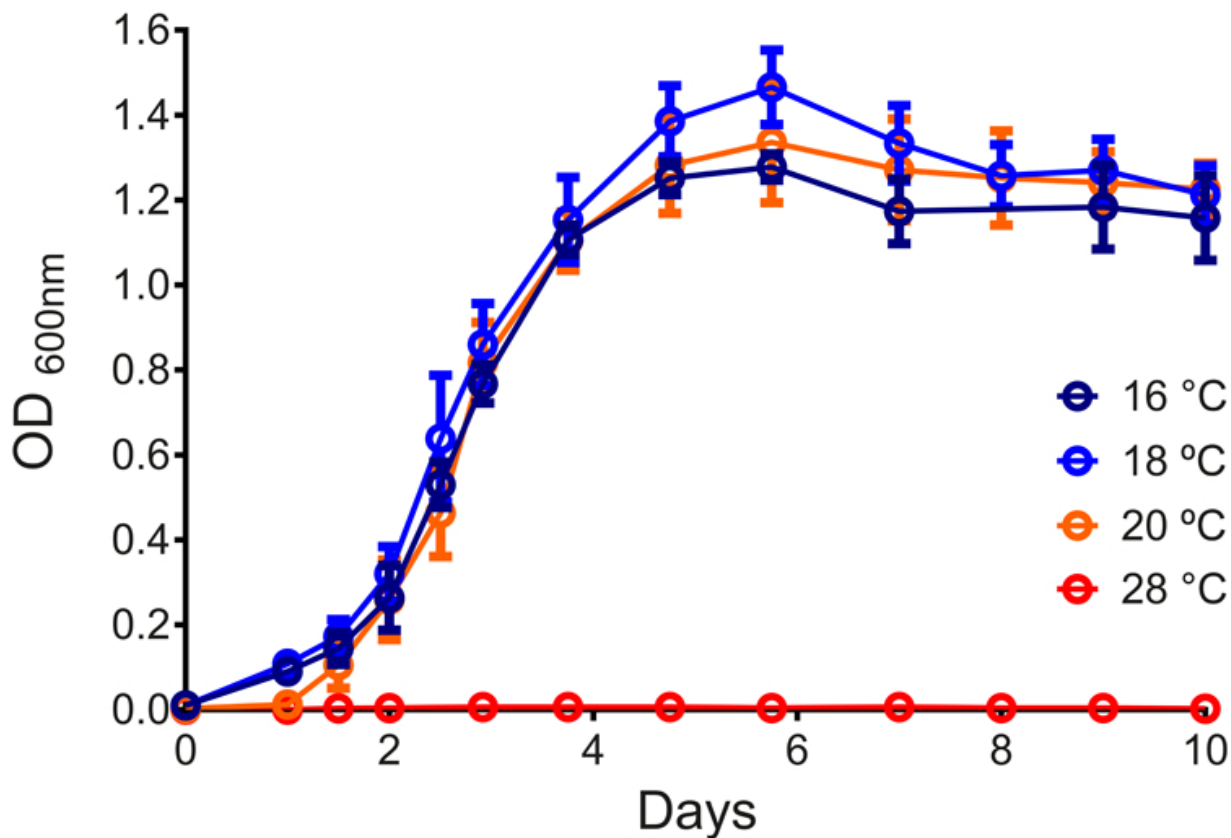

Figure S2. *P. salmonis* LF-89 growth curves in Austral-SRS broth medium at different temperatures. The temperatures used correspond to the cell lines infection temperature (16 °C), routine bacterial growth temperature (18 °C), ZKPCC infection temperature (20 °C), and zebra-fish rearing temperature (28 °C).
