# Supplementary material for: Comparative Analysis of Salmon Cell Lines and Zebrafish Primary Cell Cultures Infection with the Fish Pathogen Piscirickettsia salmonis
Source: MDPI journal article supplement (doi:10.3390/microorganisms9122516), 2021-12-06
Supplement: s1 [file s1]

Table S1. Quality of RNA samples measured by absorbance 260/280 ratio.

| Sample                                         | Absorbance (ratio 260/280) |
|------------------------------------------------|----------------------------|
| Control (mock-infected)                        |                            |
| ASK 6 dpi (1)                                  | 1.99                       |
| ASK 6 dpi (2)                                  | 2.15                       |
| ASK 6 dpi (3)                                  | 2.08                       |
| ASK 12 dpi (1)                                 | 2.43                       |
| ASK 12 dpi (2)                                 | 2.30                       |
| ASK 12 dpi (3)                                 | 2.17                       |
| SHK-1 6 dpi (1)                                | 2.19                       |
| SHK-1 6 dpi (2)                                | 2.10                       |
| SHK-1 6 dpi (3)                                | 2.04                       |
| SHK-1 12 dpi (1)                               | 2.18                       |
| SHK-1 12 dpi (2)                               | 2.08                       |
| SHK-1 12 dpi (3)                               | 2.13                       |
| ZKPCC 1 dpi (1)                                | 2.24                       |
| ZKPCC 1 dpi (2)                                | 2.13                       |
| ZKPCC 1 dpi (3)                                | 2.19                       |
| ZKPCC 5 dpi (1)                                | 2.03                       |
| ZKPCC 5 dpi (2)                                | 2.03                       |
| ZKPCC 5 dpi (3)                                | 2.17                       |
| Infection ( <i>P. salmonis</i> LF-89)          |                            |
| ASK 6 dpi (1)                                  | 2.21                       |
| ASK 6 dpi (2)                                  | 2.13                       |
| ASK 6 dpi (3)                                  | 2.17                       |
| ASK 12 dpi (1)                                 | 2.19                       |
| ASK 12 dpi (2)                                 | 2.22                       |
| ASK 12 dpi (3)                                 | 2.17                       |
| SHK-1 6 dpi (1)                                | 1.98                       |
| SHK-1 6 dpi (2)                                | 2.01                       |
| SHK-1 6 dpi (3)                                | 2.15                       |
| SHK-1 12 dpi (1)                               | 2.18                       |
| SHK-1 12 dpi (2)                               | 2.16                       |
| SHK-1 12 dpi (3)                               | 2.16                       |
| ZKPCC 1 dpi (1)                                | 2.25                       |
| ZKPCC 1 dpi (2)                                | 2.18                       |
| ZKPCC 1 dpi (3)                                | 2.17                       |
| ZKPCC 5 dpi (1)                                | 2.14                       |
| ZKPCC 5 dpi (2)                                | 2.03                       |
| ZKPCC 5 dpi (3)                                | 2.19                       |
| <i>P. salmonis</i> LF-89 in Austral-SRS medium |                            |
| <i>P. salmonis</i> (1)                         | 2.09                       |
| <i>P. salmonis</i> (2)                         | 2.07                       |
| <i>P. salmonis</i> (3)                         | 2.19                       |
