# Supplementary material for: Comparative Analysis of Salmon Cell Lines and Zebrafish Primary Cell Cultures Infection with the Fish Pathogen Piscirickettsia salmonis
Source: MDPI journal article supplement (doi:10.3390/microorganisms9122516), 2021-12-06
Supplement: s1 [file s1]

**S2 Table. Primers used for RT-qPCR in this study**

| <i>Piscirickettsia salmonis</i>                         |                 |                           |                           |                   |                |                            |
|---------------------------------------------------------|-----------------|---------------------------|---------------------------|-------------------|----------------|----------------------------|
| Gene name                                               | Gene symbol     | Forward sequence<br>5'→3' | Reverse sequence<br>3'→5' | Primer efficiency | Locus tag      | Reference                  |
| <i>outer membrane protein</i>                           | <i>ompA</i>     | CCCCAGCTTTCACCATTAAA      | AATTGGATAGTGCCAGCAG       | 2.035             | PSLF89_RS23070 | Ortiz-Severin et al., 2020 |
| <i>flagellin</i>                                        | <i>fliC</i>     | CACTGATCGCGCAAATCTAA      | ATTGCGCTGCCTGTAATACC      | 1.989             | PSLF89_RS23485 |                            |
| <i>fibronectin-binding protein</i>                      | <i>cadF</i>     | TGCAGTCATTTGTGCTGGAT      | AAACGAAATGGTGCATAGCC      | 1.996             | PSLF89_RS29915 |                            |
| <i>chemotaxis protein</i>                               | <i>cheY</i>     | GTTGGGCTCGCCTTATTAGA      | AGCAGACACCACATCGGTTT      | 1.982             | PSLF89_RS30125 |                            |
| <i>invasion associated protein</i>                      | <i>iap/cwba</i> | GGTATGACGGACGCTTTGAT      | ATAGGCTGCTAAGGCAAGCA      | 2.000             | PSLF89_RS25340 |                            |
| <i>mammalian cell entry</i>                             | <i>mce2B</i>    | CGTCCGTTAGAATTGCTGGT      | TGCTTGCCGAACATCATCA       | 2.014             | PSLF89_RS29945 |                            |
| <i>penicillin-binding protein 1A</i>                    | <i>pbp1A</i>    | CTAAGCGCACCCAAGAACTC      | GACGGTGGTGACAACATCTG      | 1.986             | PSLF89_RS33080 |                            |
| <i>tetraacyldisaccharide 4'-kinase</i>                  | <i>lpxK</i>     | CACGAGGTTATGGCGCTAAT      | GGCACACCCGTTAGTTGTTT      | 2.030             | PSLF89_RS25880 |                            |
| <i>glutamate-1-semialdehyde aminotransferase</i>        | <i>hemL</i>     | TGGTGCACCTCTGATCTTTG      | CAACAGGCATACCTCCACCT      | 2.014             | PSLF89_RS35745 |                            |
| <i>ferric iron reductase</i>                            | <i>fhuF</i>     | TGGCCATCAGGTTCAATCTT      | AACTGGCTTGGGTATTGACG      | 2.029             | PSLF89_RS24790 |                            |
| <i>(p)ppGpp synthase/hydrolase</i>                      | <i>relA</i>     | TGCGTATTATGGTCGGTGAA      | ACCATTTTCTTTTGGCGTTG      | 2.021             | PSLF89_RS22790 |                            |
| <i>stationary phase specific sigma factor</i>           | <i>rpoS</i>     | CGCGAGATTTGTCTCAATCA      | GCCACAGGATCTGCCATATT      | 2.016             | PSLF89_RS25070 |                            |
| <i>two component response transcriptional regulator</i> | <i>mprA</i>     | GAGAGCGAGCCTGTCAATCT      | CAACCGTAGAGGGATTGCAT      | 2.008             | PSLF89_RS27550 |                            |
| <i>bifunctional (p)ppGpp synthase/hydrolase</i>         | <i>spoT</i>     | ATGCTGGACGCGGTATTATC      | GACATTTCCACACGAACACG      | 1.984             | PSLF89_RS28815 |                            |
| <i>stringent starvation protein A</i>                   | <i>sspA</i>     | TTTACGCTGGTTGATTGCAG      | TGCATCACGAGAAAACAAGC      | 1.999             | PSLF89_RS19855 |                            |
| <i>type IV secretion system protein</i>                 | <i>icmE</i>     | CGCTTAAGTGCACAGGATCA      | TATCCCAATCACCCACCATT      | 2.031             | PSLF89_RS30855 |                            |
| <i>type IV secretion system protein</i>                 | <i>icmG</i>     | CCAGGTTAAATTGTTGGTTGC     | CAAACCCAGAGCTCGTGATA      | 1.988             | PSLF89_RS30850 |                            |
| <i>type IV secretion system protein</i>                 | <i>icmJ</i>     | TGATGATCGCAATGGCTAAA      | ACCAGAAACCCGACTCAATG      | 2.023             | PSLF89_RS30800 |                            |
| <i>type IV secretion system protein</i>                 | <i>icmB</i>     | TGCCGATATTGGCTGATACA      | GGGCTCGTTAGTGTTGAAAA      | 2.012             | PSLF89_RS30790 |                            |
| <i>type IV secretion system protein</i>                 | <i>icmG</i>     | AAGGCCGATGTTGCATTATT      | GCCTTTCGCTGACTTACTGC      | 2.007             | PSLF89_RS24230 |                            |

|                                                  |                    |                                   |                                   |                          |                         |                          |
|--------------------------------------------------|--------------------|-----------------------------------|-----------------------------------|--------------------------|-------------------------|--------------------------|
| <i>type IV secretion system protein</i>          | <i>icmP</i>        | TCGACGACCCATGATATGAA              | TTTCTTCACCAACCCAAACC              | 1.990                    | PSLF89_RS24275          |                          |
| <i>type IV secretion system protein</i>          | <i>icmB</i>        | GATATTGGGCCTTCAAGCAA              | GCCCCTAACTGCGTATCAAA              | 1.988                    | PSLF89_RS24290          |                          |
| <i>type IV secretion system protein</i>          | <i>icmV</i>        | CATTGATGACGGCAATTATAGG            | CAAGCTGGCCGACTTTAATC              | 2.003                    | PSLF89_RS24320          |                          |
| <i>murine toxin</i>                              | <i>ymt</i>         | ATGTGCAATGGCTATGCTGA              | ATCAGGCCAACTTTCCAATG              | 2.023                    | PSLF89_RS34605          |                          |
| <i>cell filamentation protein</i>                | <i>fic</i>         | CAGCCTCGTATGATTGACCA              | GGCCATTACCATCAGCAAAT              | 2.008                    | PSLF89_RS34625          |                          |
| <i>secreted effector protein</i>                 | <i>pipB2</i>       | GCGATGCCACACCTAAATCT              | TTCTTGTGGCAAATGAGCAG              | 1.983                    | PSLF89_RS34855          |                          |
| <i>secreted effector protein</i>                 | <i>pipB2</i>       | TGGGTGGAATCTTGAAGGAG              | TTTTTCGCAACAGTGCCTAA              | 1.998                    | PSLF89_RS34870          |                          |
| <i>secreted effector protein</i>                 | <i>pipB2</i>       | GCGATGCCACACCTAAATCT              | TTCTTGTGGCAAATGAGCAG              | 2.000                    | PSLF89_RS35360          |                          |
| <i>endopeptidase</i>                             | <i>pepO</i>        | TGAAGACCGTGGATACACACA             | GGGAAGAGGTTGAAGAGTCG              | 2.020                    | PSLF89_RS34880          |                          |
| <i>enterotoxin</i>                               | <i>ospD3</i>       | AGCGGCTTATATCCATGGTG              | AATAGGTTTCTGCCGCTTGA              | 1.987                    | PSLF89_RS27860          |                          |
| <i>serine/threonine protein kinase</i>           | <i>pkn5</i>        | TTTTGGCTGGAAGAAGGCTA              | TGCTGCGATATCTTCGTTTG              | 1.979                    | PSLF89_RS28440          |                          |
| <i>DNA replication and repair family protein</i> | <i>recF</i>        | CGCCTTCAAGCCAATTGTGG              | GCAAGCTTTTCACCTTGCCA              | 2.003                    | PSLF89_RS33770          |                          |
| <i>Transcription termination factor</i>          | <i>rho</i>         | GCCAAGCGTTTGGTTGAACA              | CTGAAGATGGTGCGACCGTA              | 2.098                    | PSLF89_RS32915          |                          |
| <i>Salmo salar</i>                               |                    |                                   |                                   |                          |                         |                          |
| <b>Gene name</b>                                 | <b>Gene symbol</b> | <b>Forward sequence<br/>5'→3'</b> | <b>Reverse sequence<br/>3'→5'</b> | <b>Primer efficiency</b> | <b>Accession number</b> | <b>Reference</b>         |
| <i>interleukin 1, beta</i>                       | <i>il1b</i>        | GGAGAGGTTAAAGGGTGGCG              | TCCTTGAAC TCGTTCCCAT              | 2.058                    | AY617117                | Schiøtz et al., 2009     |
| <i>interleukin 6</i>                             | <i>il6</i>         | CAGCTTCTTCTTCAGCACGTTAA           | CGTAGACACCTCACCCAGAAC             | 2.008                    | HF913655                | Zante et al 2015         |
| <i>interleukin 8</i>                             | <i>il8</i>         | AGCGGCAGATTCAAAC TCAC             | GTTGTTGGCCAGCATCTTCT              | 1.984                    | BT046706                | Reyes-Cerpa et al., 2012 |
| <i>interleukin 10</i>                            | <i>il10</i>        | GAACTCCGCACATCCTTCTC              | CGTTGATGTCAAACGGTTTCT             | 1.993                    | EF165029                | Reyes-Cerpa et al., 2012 |
| <i>interleukin 12</i>                            | <i>il12</i>        | CTGAATGAGGTGGACTGGTATG            | ATCGTCCTGTTCTCCG                  | 2.001                    | BT049114                | Hynes et al., 2011       |
| <i>interferon alpha</i>                          | <i>ifnα</i>        | CCTGCCATGAAACCTGAGAAGA            | TTTCCTGATGAGCTCCCATGC             | 2.022                    | XM_014192435.1          | Jørgensen et al., 2007   |

|                                                        |              |                          |                          |       |            |                        |
|--------------------------------------------------------|--------------|--------------------------|--------------------------|-------|------------|------------------------|
| <i>interferon gamma</i>                                | <i>ifnγ</i>  | TTCAGGAGACCCAGAAACACTAC  | TAATGAACTCGGACAGAGCCTTC  | 2.016 | AY795563   | Jørgensen et al., 2007 |
| <i>tumor necrosis factor alpha</i>                     | <i>tnfa</i>  | CCAAACATTGGCTTGCACGA     | AGCAGCAGGTCCTGAGAGTA     | 1.990 |            | Pulgar et al., 2015    |
| <i>selenoprotein Pa</i>                                | <i>selPa</i> | TGGCTGGAAAGAAGGATGAC     | TGCTCTCATACGTGCAGTCC     | 2.003 |            | Pulgar et al., 2015    |
| <i>interferon-induced guanylate binding protein 1,</i> | <i>gbp1</i>  | CGTCAATCAGCTGTCAGAGAACCA | TCGGAGGCATCCTTGTCTGTTTG  | 2.005 |            | Alvares et al., 20176  |
| <i>cathepsin D</i>                                     | <i>cstD</i>  | GCCTGTCATCACATTCAACCT    | CCACTCAGGCAGATGGTCTTA    | 1.993 | U90321     | Alvares et al., 20176  |
| <i>hepcidin</i>                                        | <i>hamp</i>  | CATTGAAAATCGTGCATTGG     | AAGGCCTTCATTCTCGGTTT     | 1.998 |            | Pulgar et al., 2015    |
| <i>transferrin receptor</i>                            | <i>trfr</i>  | TTGTCGCAACCCCTATAACC     | AAGACAGCCCACATCAGGTC     | 2.001 |            | Pulgar et al., 2015    |
| <i>ferritin, lower subunit</i>                         | <i>ferl</i>  | TGTGCATGCATTTCCGTTAT     | TTCAGTGCGAACCCATTACA     | 2.004 |            | Pulgar et al., 2015    |
| 18S RNA                                                | <i>18S</i>   | TGTGCCGCTAGAGGTGAAATT    | GCAAATGCTTTCGCTTTCG      | 1.985 | AJ427629.1 | Jørgensen et al., 2007 |
| <i>elongation factor 1 alpha</i>                       | <i>eef1a</i> | CACCACCGGCCATCTGATCTACAA | TCAGCAGCCTCCTTCTCGAACTTC | 2.000 | AF321836   | Jørgensen et al., 2007 |

***Danio rerio***

| Gene name                  | Gene symbol  | Forward sequence<br>5'→3'             | Reverse sequence<br>3'→5' | Primer efficiency | Accession number | Reference             |
|----------------------------|--------------|---------------------------------------|---------------------------|-------------------|------------------|-----------------------|
| <i>interleukin 1, beta</i> | <i>il1b</i>  | QuantiTect Primer Assay Dr_il1b_1_SG  |                           | 2.027             | NM_212844,       | Tandberg et al., 2016 |
| <i>interleukin 8</i>       | <i>il8</i>   | QuantiTect Primer Assay Dr_il8_1_SG   |                           | 2.004             | XM_001342570,    | Tandberg et al., 2016 |
| <i>interleukin 10</i>      | <i>il10</i>  | QuantiTect Primer Assay Dr_il10_1_SG  |                           | 1.999             | NM_001020785     | Tandberg et al., 2016 |
| <i>interleukin 12a</i>     | <i>il12</i>  | QuantiTect Primer Assay Dr_il12a_1_SG |                           | 1.998             | NM_00100710      | Tandberg et al., 2016 |
| <i>interferon phi 1</i>    | <i>ifnΦ1</i> | QuantiTect Primer Assay Dr_ifnphi1_SG |                           | 1.981             | NM_207640,       | This study            |
| <i>interferon phi 2</i>    | <i>ifnΦ2</i> | QuantiTect Primer Assay Dr_ifnphi2_SG |                           | 2.026             | NM_00111108      | This study            |

|                                                             |                   |                                         |                         |       |                                               |                       |
|-------------------------------------------------------------|-------------------|-----------------------------------------|-------------------------|-------|-----------------------------------------------|-----------------------|
| <i>interferon phi 3</i>                                     | <i>ifnΦ3(1)</i>   | QuantiTect Primer Assay Dr_ifnphi3_1_SG |                         | 2.024 | NM_001111083                                  | This study            |
| <i>interferon phi 3</i>                                     | <i>ifnΦ3(2)</i>   | QuantiTect Primer Assay Dr_ifnphi3_2_SG |                         | 2.032 | NM_00111108                                   | This study            |
| <i>interferon gamma</i>                                     | <i>ifnγ1-1</i>    | QuantiTect Primer Assay Dr_ifng1-1_1_SG |                         | 1.992 | NM_001020793                                  | This study            |
| <i>interferon gamma</i>                                     | <i>ifnγ1-2</i>    | QuantiTect Primer Assay Dr_ifng1-2_1_SG |                         | 2.040 | NM_212864                                     | Tandberg et al., 2016 |
| <i>tumor necrosis factor alpha</i>                          | <i>tnfα</i>       | QuantiTect Primer Assay Dr_tnfa_1_SG    |                         | 1.997 | NM_212859                                     | Tandberg et al., 2017 |
| <i>iNOS (inducible nitric oxide synthetase)</i>             | <i>nos2a</i>      | QuantiTect Primer Assay Dr_nos2a_1_SG   |                         | 2.024 | NM_001104937                                  | This study            |
| <i>selenoprotein Pa</i>                                     | <i>sepp1a</i>     | QuantiTect Primer Assay Dr_sepp1a_1_SG  |                         | 1.951 | NM_178297                                     | This study            |
| <i>interferon-induced guanylate-binding protein 1, GBP1</i> | <i>gbp1</i>       | QuantiTect Primer Assay Dr_gbp1_1_SG    |                         | 1.976 | NM_001002343<br>XM_005171375,<br>XM_005171376 | This study            |
| <i>cathepsin D</i>                                          | <i>ctsd</i>       | Dr_ctsd_1_SG QuantiTect Primer Assay    |                         | 2.046 | NM_131710,<br>XM_005159140                    | Sieger et al., 2009   |
| <i>hepcidin</i>                                             | <i>hamp1</i>      | QuantiTect Primer Assay Dr_hamp1_1_SG   |                         | 1.993 | NM_205583,<br>XM_005170766<br>XM_005170767    | This study            |
| <i>transferrin receptor</i>                                 | <i>tfr2</i>       | QuantiTect Primer Assay Dr_tf2_1_SG     |                         | 1.992 | NM_001009916                                  | This study            |
| <i>transferrin</i>                                          | <i>tfa1</i>       | QuantiTect Primer Assay Dr_tfa1_1_SG    |                         | 2.023 | NM_001015057<br>XM_005168411<br>XM_005168412  | This study            |
| <i>ferritin</i>                                             | <i>fth1a</i>      | QuantiTect Primer Assay Dr_fth1a_1_SG   |                         | 1.975 | NM_131585,<br>XM_005166370,<br>XM_005166371   | This study            |
| <i>interleukin 6</i>                                        | <i>il6</i>        | TCAACTTCTCCAGCGTGATG                    | TCTTTCCCTCTTTTCCTCCTG   | 2.033 | NM_001114318                                  | Tandberg et al., 2016 |
| <i>myeloperoxidase</i>                                      | <i>mpx</i>        | TGATGTTTGTTAGGAGGTG                     | GAGCTGTTTCTGTTTGGTG     | 2.010 | NM_212779                                     | Tandberg et al., 2016 |
| <i>macrophage expressed gene 1</i>                          | <i>mpeg-1</i>     | TACAGCACGGGTCAAGTCCGT                   | ACTTGTGATGACATGGGTGCC G | 1.990 | NM_212737                                     | Tandberg et al., 2016 |
| <i>18S rRNA</i>                                             | <i>zgc:158463</i> | GCCTGCGGCTTAATTTGACT                    | ACCACCCACAGAATCGAGAAA   | 1.948 | NM_001098396                                  | Tandberg et al., 2016 |

|                                                           |          |                           |                         |       |             |                       |
|-----------------------------------------------------------|----------|---------------------------|-------------------------|-------|-------------|-----------------------|
| Eukaryotic translation elongation factor 1 alpha 1, like1 | eef1a111 | CTT CTC AGG CTG ACT GTG C | CCG CTA GCA TTA CCC TCC | 2.035 | NM_131263.1 | Tandberg et al., 2016 |
|-----------------------------------------------------------|----------|---------------------------|-------------------------|-------|-------------|-----------------------|

Alvarez, C.A.; Gomez, F.A.; Mercado, L.; Ramirez, R.; Marshall, S.H. *Piscirickettsia salmonis* imbalances the innate immune response to succeed in a productive infection in a salmonid cell line model. PLoS One 2016, 11, 1.

Hynes NA, Furnes C, Fredriksen BN, Winther T, Bøgwald J, Larsen AN, Dalmo RA. Immune response of Atlantic salmon to recombinant flagellin. Vaccine 2011, 29, 7678.

Jørgensen SM, Hetland DL, Press CM, Grimholt U, Gjøen T. Effect of early infectious salmon anaemia virus (ISAV) infection on expression of MHC pathway genes and type I and II interferon in Atlantic salmon (*Salmo salar* L.) tissues. Fish Shellfish Immunol. 2007, 23, 57.

Ortiz-Severín, J.; Travisany, D.; Maass, A.; Verónica Cambiazo; Chávez, F.P. Global proteomic profiling of *Piscirickettsia salmonis* and salmon macrophage-like cells during intracellular infection. Microorganisms 2020, 8, 1845.

Pulgar, R.; Hödar, C.; Travisany, D.; Zuñiga, A.; Domínguez, C.; Maass, A.; González, M.; Cambiazo, V. Transcriptional response of Atlantic salmon families to *Piscirickettsia salmonis* infection highlights the relevance of the iron-deprivation defence system. BMC Genomics 2015, 16, 495.

Reyes-Cerpa S, Reyes-López FE, Toro-Ascuy D, Ibañez J, Maisey K, Sandino AM, Imarai M. IPNV modulation of pro and anti-inflammatory cytokine expression in Atlantic salmon might help the establishment of infection and persistence. Fish Shellfish Immunol. 201, 32, 291.

Schiøtz BL, Baekkevold ES, Poulsen LC, Mjaaland S, Gjøen T. Analysis of host- and strain-dependent cell death responses during infectious salmon anemia virus infection *in vitro*. Virol J. 2009, 6, 91.

Tandberg JI, Lagos LX, Langlete P, Berger E, Rishovd AL, Roos N, Varkey D, Paulsen IT, Winther-Larsen HC. Comparative analysis of membrane vesicles from three *Piscirickettsia salmonis* isolates reveals differences in vesicle characteristics. PLoS One 2016, 11, e0165099.

Tandberg J, Oliver C, Lagos L, Gaarder M, Yáñez AJ, Ropstad E, Winther-Larsen HC. Membrane vesicles from *Piscirickettsia salmonis* induce protective immunity and reduce development of salmonid rickettsial septicemia in an adult zebrafish model. Fish Shellfish Immunol. 2017, 67, 189.

Zante MD, Borchel A, Brunner RM, Goldammer T, Rebl A. Cloning and characterization of the proximal promoter region of rainbow trout (*Oncorhynchus mykiss*) interleukin-6 gene. Fish Shellfish Immunol. 2015, 43, 249.

Sieger, D., Stein, C., Neifer, D., van der Sar, A. M., & Leptin, M. The role of gamma interferon in innate immunity in the zebrafish embryo. Disease models & mechanisms.2009, 2(11-12), 571-581.
